# Supplementary material
Source: publisher figshare collection journal article supplement (https://karger.figshare.com/ndownloader/files/14413466)

**Supplemental Figure 4 (Figure S4): Pathogenic mutations in Other group patients.**

NCBI reference sequences were used: *NPHP4*, NM_015102.4; *OFD1*, NM_003611.2; *PKHD1*, NM_138694.3.


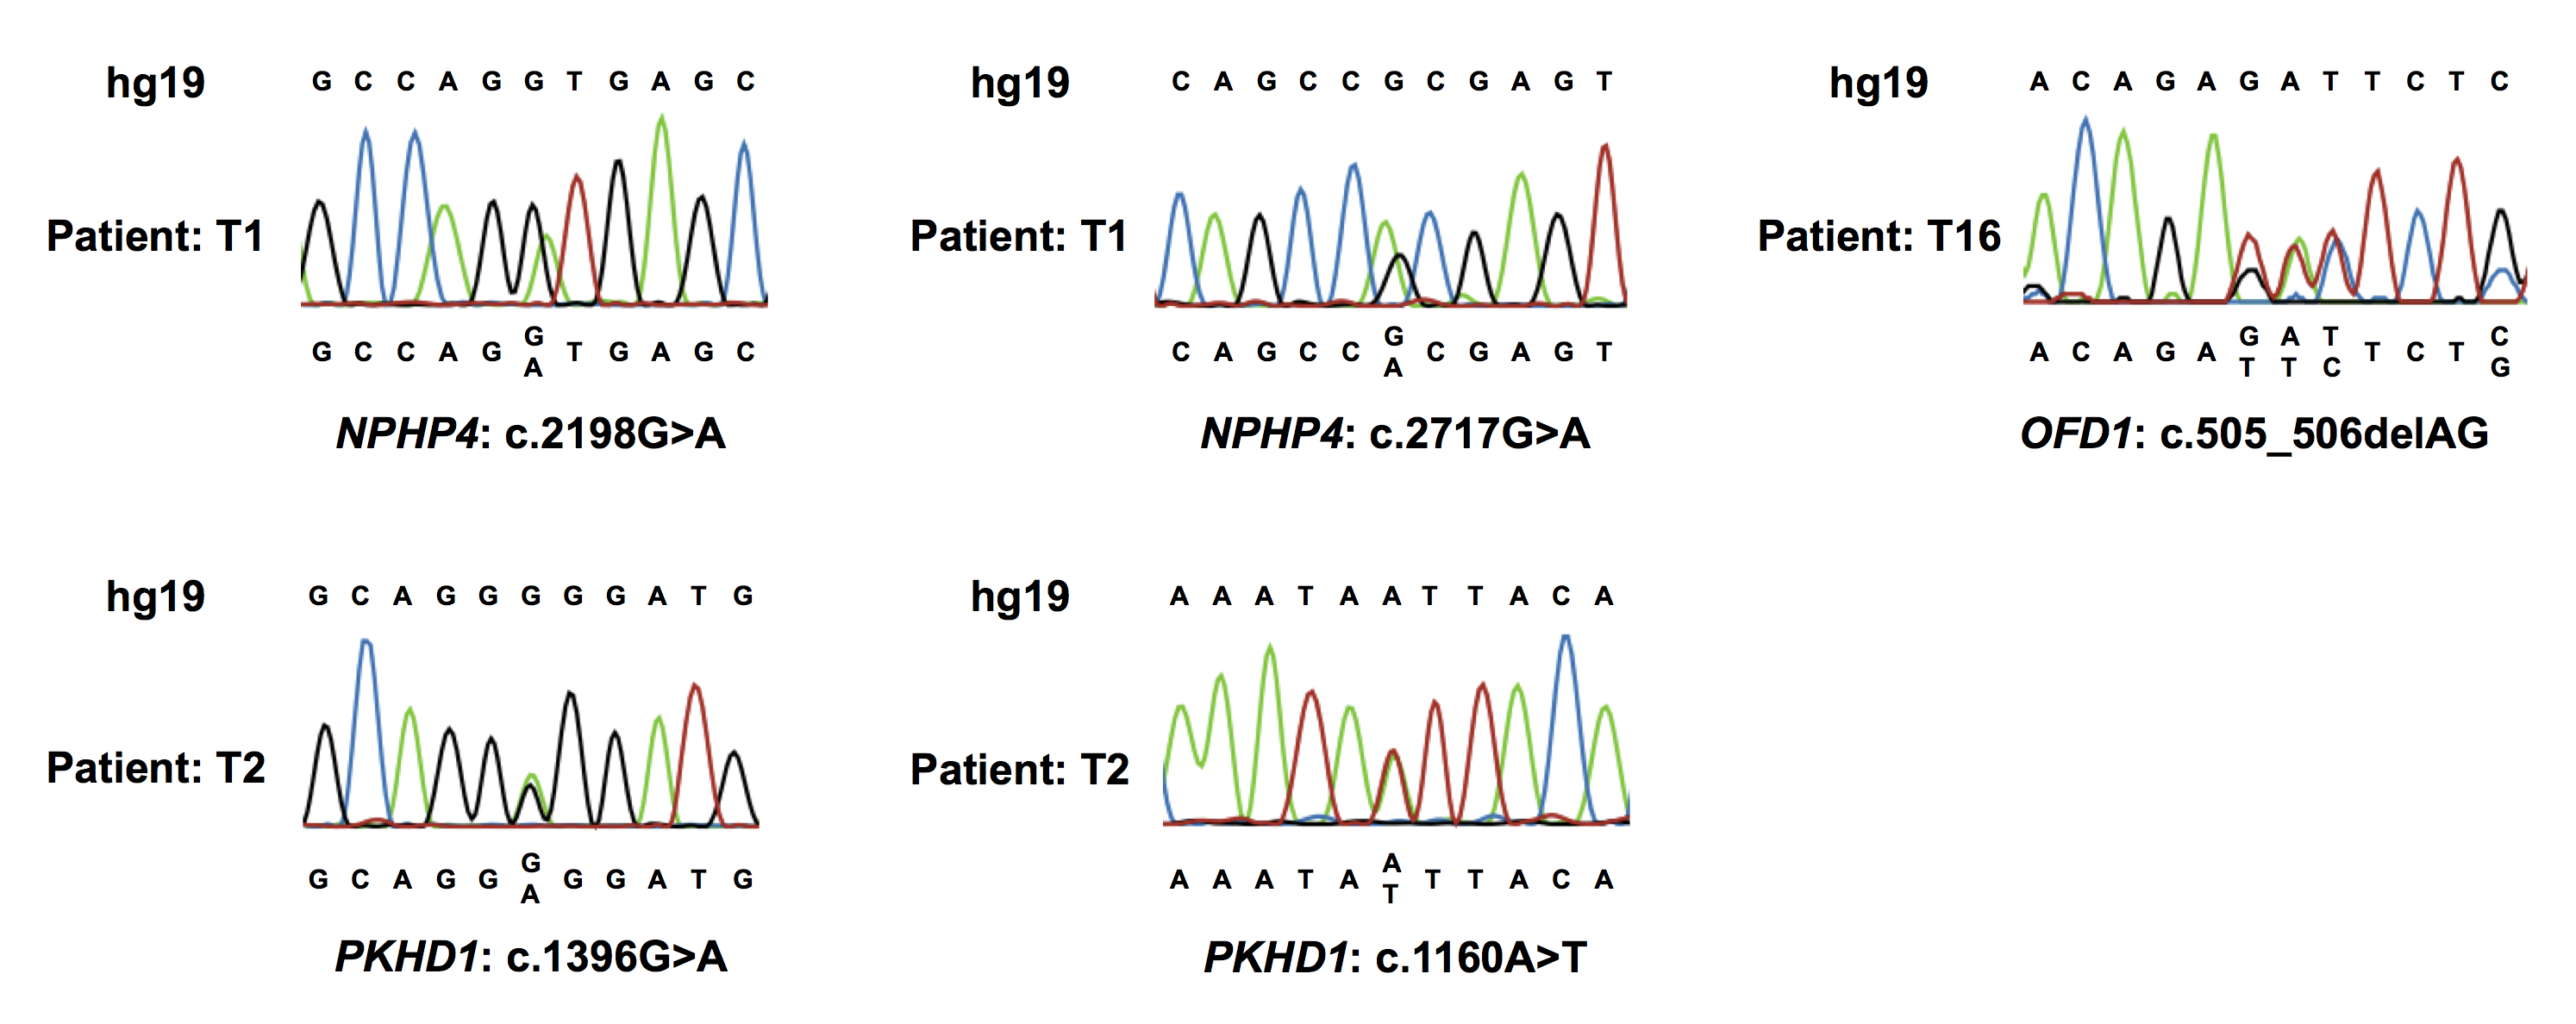

Supplement: Supplementary file 1 [file 14413466]
